# Supplementary material for: On Prototropy and Bond Length Alternation in Neutral and Ionized Pyrimidine Bases and Their Model Azines in Vacuo
Source: MDPI journal article supplement (doi:10.3390/molecules28217282), 2023-10-26
Supplement: s1 [file s1]

# On Prototropy and Bond-Length Alternation in Neutral and Ionized Pyrimidine Bases and Their Model Azines in Vacuo

Ewa D. Raczyńska

Department of Chemistry, Warsaw University of Life Sciences (SGGW),  
ul. Nowoursynowska 159c, 02-776 Warszawa, Poland,  
[ewa\\_raczyńska@sggw.edu.pl](mailto:ewa_raczyńska@sggw.edu.pl); Tel.: +48-22-59-37623

| Contents                                                                                                                                  | Page |
|-------------------------------------------------------------------------------------------------------------------------------------------|------|
| Relative Gibbs energies for neutral and ionized tautomers-rotamers of phenol and mono-hydroxy azines (Table S1)                           | S2   |
| Relative Gibbs energies for neutral and ionized tautomers-rotamers of aniline and mono-amino azines (Table S2)                            | S3   |
| Relative Gibbs energies for neutral and ionized tautomers-rotamers of pyrimidine bases (Table S3)                                         | S4   |
| HOMED indices for neutral and ionized tautomers-rotamers of phenol and mono-hydroxy azines (Table S4)                                     | S6   |
| HOMED indices for neutral and ionized tautomers-rotamers of aniline and mono-amino azines (Table S5)                                      | S7   |
| HOMED indices for neutral and ionized tautomers-rotamers of pyrimidine bases (Table S6)                                                   | S8   |
| Composition of isomeric mixtures for neutral mono-hydroxy azines estimated at the G2 level (Table S7)                                     | S10  |
| Twenty-one tautomers-rotamers possible for isocytosine (Figure S1)                                                                        | S11  |
| Plots between $\Delta G$ s of all tautomers-rotamers of neutral pyrimidine bases (Figure S2)                                              | S12  |
| Plots between HOMED6s and $\Delta G$ s of all tautomers-rotamers of neutral mono-hydroxy model compounds and pyrimidine bases (Figure S3) | S13  |
| Plots between HOMED8s and $\Delta G$ s of all tautomers-rotamers of neutral pyrimidine bases (Figure S4)                                  | S14  |
| Lack of linear relations between reformulated HOMAs and HOMEDs of all tautomers-rotamers of neutral pyrimidine bases (Figure S5)          | S15  |
| Plots between $\Delta G$ s of neutral and ionized tautomers-rotamers of pyrimidine bases (Figure S6)                                      | S16  |
| Plots between HOMEDs of neutral and ionized tautomers-rotamers of pyrimidine bases (Figure S7)                                            | S17  |
| List of abbreviations applied in the main text                                                                                            | S18  |

**Table S1.** Relative Gibbs energies ( $\Delta G$ )<sup>a</sup> for neutral, positively and negatively ionized tautomers-rotamers of phenol and mono-hydroxy aromatic azines.

| Compound                         | Isomer             | $\Delta G$ |                |               |
|----------------------------------|--------------------|------------|----------------|---------------|
|                                  |                    | Neutral    | Radical cation | Radical anion |
| Phenol <sup>b</sup>              | <b>a</b>           | 0.0        | 0.0            | 0.0           |
|                                  | <b>b/d</b>         | 16.7       | 26.6           | -19.8         |
|                                  | <b>c</b>           | 16.3       | 31.6           | -11.1         |
| 2-Hydroxypyridine <sup>c</sup>   | <b>2HOPY-a1</b>    | 0.0        | 0.0            | 0.0           |
|                                  | <b>2HOPY-a2</b>    | 5.2        | 6.3            | 5.2           |
|                                  | <b>2HOPY-b</b>     | -0.9       | -11.0          | -11.4         |
|                                  | <b>2HOPY-c</b>     | 23.0       | 30.7           | -1.0          |
|                                  | <b>2HOPY-d</b>     | 23.6       | 30.0           | -13.7         |
| 4-Hydroxypyridine <sup>c</sup>   | <b>4HOPY-a</b>     | 0.0        | 0.0            | 0.0           |
|                                  | <b>4HOPY-b/d</b>   | 17.5       | 23.8           | -20.3         |
|                                  | <b>4HOPY-c</b>     | 1.2        | -11.4          | -6.9          |
| 2-Hydroxypyrimidine <sup>c</sup> | <b>2HOPM-a1/a2</b> | 0.0        | 0.0            | 0.0           |
|                                  | <b>2HOPM-b/d</b>   | 0.9        | -7.9           | -10.3         |
|                                  | <b>2HOPM-c</b>     | 24.7       | 17.9           | 3.0           |
| 4-Hydroxypyrimidine <sup>c</sup> | <b>4HOPM-a1</b>    | 0.0        | 0.0            | 0.0           |
|                                  | <b>4HOPM-a2</b>    | 5.2        | 4.0            | 4.9           |
|                                  | <b>4HOPM-b</b>     | -2.1       | -17.2          | -12.3         |
|                                  | <b>4HOPM-c</b>     | 7.0        | -9.7           | 5.2           |
|                                  | <b>4HOPM-d</b>     | 24.5       | 15.0           | -14.0         |

<sup>a</sup>  $\Delta G$  (in kcal mol<sup>-1</sup>) refers to difference between  $G$  of **a-d** and that of **a** (or **a1**) estimated at the DFT(B3LYP)/6-311+G(d,p) level at 298.15 K. <sup>b</sup> As in ref. [18]. <sup>c</sup> As in ref. [49].

**Table S2.** Relative Gibbs energies ( $\Delta G$ )<sup>a</sup> for neutral, positively and negatively ionized tautomers-rotamers of aniline and mono-amino aromatic azines.

| Compound                       | Isomer            | $\Delta G$ |                |               |
|--------------------------------|-------------------|------------|----------------|---------------|
|                                |                   | Neutral    | Radical cation | Radical anion |
| Aniline <sup>b</sup>           | <b>a</b>          | 0.0        | 0.0            | 0.0           |
|                                | <b>b1/d2</b>      | 28.2       | 43.1           | -4.7          |
|                                | <b>b2/d1</b>      | 28.4       | 43.0           | -3.4          |
|                                | <b>c</b>          | 26.5       | 47.9           | 4.6           |
| 2-Aminopyridine <sup>c</sup>   | <b>2APY-a</b>     | 0.0        | 0.0            | 0.0           |
|                                | <b>2APY-b1</b>    | 16.7       | 7.5            | 5.3           |
|                                | <b>2APY-b2</b>    | 13.9       | 3.9            | 2.0           |
|                                | <b>2APY-c1</b>    | 28.8       | 50.2           | 7.9           |
|                                | <b>2APY-c2</b>    | 32.8       | 51.2           | 11.6          |
|                                | <b>2APY-d1</b>    | 30.4       | 50.4           | -4.2          |
|                                | <b>2APY-d2</b>    | 35.0       | 52.9           | 0.6           |
| 4-Aminopyridine <sup>c</sup>   | <b>4APY-a</b>     | 0.0        | 0.0            | 0.0           |
|                                | <b>4APY-b1/d2</b> | 30.4       | 39.8           | -3.4          |
|                                | <b>4APY-b2/d1</b> | 29.8       | 39.8           | -4.6          |
|                                | <b>4APY-c</b>     | 16.4       | -1.9           | 8.3           |
| 2-Aminopyrimidine <sup>d</sup> | <b>2APM-a</b>     | 0.0        | 0.0            | 0.0           |
|                                | <b>2APM-b1/d2</b> | 24.1       | 14.7           | 10.2          |
|                                | <b>2APM-b2/d1</b> | 17.4       | 6.5            | 3.5           |
|                                | <b>2APM-c</b>     | 36.4       | 44.0           | 15.6          |
| 4-Aminopyrimidine <sup>e</sup> | <b>4APM-a</b>     | 0.0        | 0.0            | 0.0           |
|                                | <b>4APM-b1</b>    | 16.2       | 4.8            | 4.6           |
|                                | <b>4APM-b2</b>    | 13.3       | 1.5            | 1.5           |
|                                | <b>4APM-c1</b>    | 18.2       | 1.8            | 14.3          |
|                                | <b>4APM-c2</b>    | 22.2       | 6.2            | 18.0          |
|                                | <b>4APM-d1</b>    | 32.2       | 42.4           | -4.9          |
|                                | <b>4APM-d2</b>    | 36.8       | 43.0           | -0.3          |

<sup>a</sup>  $\Delta G$  (in kcal mol<sup>-1</sup>) refers to difference between  $G$  of **a-d** and that of **a** estimated at the DFT(B3LYP)/6-311+G(d,p) level at 298.15 K. <sup>b</sup> As in ref. [22]. <sup>c</sup> As in ref. [58]. <sup>d</sup> As in ref. [59]. <sup>e</sup> As in refs [60,61].

**Table S3.** Relative Gibbs energies ( $\Delta G$ )<sup>a</sup> for neutral, positively and negatively ionized tautomers-rotamers of pyrimidine bases.

| Compound              | Isomer | $\Delta G$ |                |               |
|-----------------------|--------|------------|----------------|---------------|
|                       |        | Neutral    | Radical cation | Radical anion |
| Uracil <sup>b</sup>   | U13    | −13.9      | −11.5          | −22.8         |
|                       | U17a   | 15.2       | 9.8            | 7.1           |
|                       | U17b   | 5.6        | 0.9            | 5.8           |
|                       | U18a   | −1.6       | −4.8           | −11.3         |
|                       | U18b   | 5.1        | 1.8            | −5.0          |
|                       | U35    | 2.7        | 25.3           | −24.9         |
|                       | U37a   | −2.3       | −9.0           | −6.8          |
|                       | U37b   | 5.1        | −1.7           | nf            |
|                       | U38a   | 9.8        | 0.9            | −4.2          |
|                       | U38b   | 7.3        | −0.5           | −4.2          |
|                       | U57a   | 21.4       | 24.2           | −12.6         |
|                       | U57b   | 19.8       | 24.2           | −14.1         |
|                       | U58a   | 20.3       | 23.0           | −1.7          |
|                       | U58b   | 27.8       | 29.3           | 4.6           |
|                       | U78aa  | 0.0        | 0.0            | 0.0           |
|                       | U78ab  | 5.3        | 6.8            | 6.3           |
|                       | U78ba  | 1.1        | 0.6            | 1.0           |
|                       | U78bb  | 5.3        | 7.9            | 5.7           |
| Cytosine <sup>c</sup> | C13a   | 2.5        | 2.4            | −4.9          |
|                       | C13b   | 0.8        | 1.3            | −7.9          |
|                       | C17aa  | 26.7       | 14.5           | 15.8          |
|                       | C17ab  | 31.0       | 18.1           | 20.1          |
|                       | C17ba  | 17.6       | 5.8            | 18.0          |
|                       | C17bb  | 21.0       | 9.4            | 20.7          |
|                       | C18    | −1.4       | 0.2            | −10.4         |
|                       | C35a   | 17.7       | nf             | −11.3         |
|                       | C35b   | 17.3       | 37.2           | −11.9         |
|                       | C37aa  | 15.9       | 5.9            | 10.0          |
|                       | C37ab  | 13.1       | 3.1            | 7.8           |
|                       | C37ba  | 23.3       | 14.6           | 13.5          |

|                          |               |      |      |       |
|--------------------------|---------------|------|------|-------|
| Isocytosine <sup>d</sup> | <b>C37bb</b>  | 20.5 | 10.8 | nf    |
|                          | <b>C38</b>    | 5.6  | −0.4 | −7.3  |
|                          | <b>C57aa</b>  | 30.8 | 38.6 | −2.9  |
|                          | <b>C57ab</b>  | 35.9 | nf   | 1.9   |
|                          | <b>C57ba</b>  | 29.9 | 39.2 | −3.6  |
|                          | <b>C57bb</b>  | 34.2 | nf   | 0.4   |
|                          | <b>C58</b>    | 20.0 | 25.2 | −1.3  |
|                          | <b>C78a</b>   | 0.0  | 0.0  | 0.0   |
|                          | <b>C78b</b>   | 0.7  | 0.4  | 0.9   |
|                          | <b>iC13a</b>  | 7.8  | 14.5 | −4.5  |
|                          | <b>iC13b</b>  | 6.5  | 11.6 | −5.6  |
|                          | <b>iC17</b>   | 10.4 | 17.0 | 1.9   |
|                          | <b>iC18aa</b> | 21.4 | 14.1 | 8.4   |
|                          | <b>iC18ab</b> | 28.2 | 20.0 | 14.8  |
|                          | <b>iC18ba</b> | 15.2 | 7.0  | 2.6   |
|                          | <b>iC18bb</b> | 21.2 | 12.0 | 8.2   |
|                          | <b>iC35a</b>  | 15.0 | 37.8 | −11.9 |
|                          | <b>iC35b</b>  | 20.1 | nf   | −5.8  |
|                          | <b>iC37</b>   | 0.8  | −1.6 | −8.8  |
|                          | <b>iC38aa</b> | 25.7 | 15.3 | 9.1   |
|                          | <b>iC38ab</b> | 23.3 | 12.8 | nf    |
|                          | <b>iC38ba</b> | 33.2 | 24.0 | 15.2  |
|                          | <b>iC38bb</b> | 29.9 | 20.6 | nf    |
|                          | <b>iC57</b>   | 16.8 | 26.7 | −15.1 |
|                          | <b>iC58aa</b> | 31.1 | 44.2 | 10.7  |
|                          | <b>iC58ab</b> | 39.1 | 50.8 | 17.0  |
|                          | <b>iC58ba</b> | 31.7 | 44.6 | 12.0  |
|                          | <b>iC58bb</b> | 38.7 | 50.8 | 17.4  |
|                          | <b>iC78a</b>  | 0.0  | 0.0  | 0.0   |
|                          | <b>iC78b</b>  | 4.4  | 5.4  | 4.5   |

<sup>a</sup>  $\Delta G$  (in kcal mol<sup>−1</sup>) for U, C, and iC relative to G of **U78aa**, **C78a**, and **iC78a**, respectively, estimated at the DFT(B3LYP)/6-311+G(d,p) level at 298.15 K (nf – structure not found). <sup>b</sup> As in refs [62,63]. <sup>c</sup> As in ref. 64]. <sup>d</sup> As in refs [28,57,65].

**Table S4.** HOMED6<sup>a,b</sup> and HOMED7<sup>b,c</sup> indices for neutral, positively and negatively ionized tautomers-rotamers of phenol and mono-hydroxy aromatic azines.

| Compound                      | Isomer             | Neutral            |        | Radical cation |        | Radical anion |        |
|-------------------------------|--------------------|--------------------|--------|----------------|--------|---------------|--------|
|                               |                    | HOMED6             | HOMED7 | HOMED6         | HOMED7 | HOMED6        | HOMED7 |
| Phenol <sup>d</sup>           | <b>a</b>           | 0.999 <sub>7</sub> | 0.920  | 0.918          | 0.927  | 0.994         | 0.916  |
|                               | <b>b/d</b>         | 0.374              | 0.470  | 0.518          | 0.606  | 0.455         | 0.567  |
|                               | <b>c</b>           | 0.403              | 0.498  | 0.613          | 0.685  | 0.503         | 0.609  |
| 2-HO-pyridine <sup>e</sup>    | <b>2HOPY-a1</b>    | 0.995              | 0.943  | 0.919          | 0.933  | 0.880         | 0.782  |
|                               | <b>2HOPY-a2</b>    | 0.996              | 0.935  | 0.908          | 0.922  | 0.908         | 0.802  |
|                               | <b>2HOPY-b</b>     | 0.803              | 0.812  | 0.808          | 0.807  | 0.745         | 0.792  |
|                               | <b>2HOPY-c</b>     | 0.332              | 0.425  | -0.023         | 0.083  | 0.477         | 0.586  |
|                               | <b>2HOPY-d</b>     | 0.342              | 0.428  | 0.166          | 0.233  | 0.432         | 0.541  |
| 4- HO-pyridine <sup>e</sup>   | <b>4HOPY-a</b>     | 0.999              | 0.937  | 0.979          | 0.970  | 0.972         | 0.907  |
|                               | <b>4HOPY-b/d</b>   | 0.358              | 0.454  | 0.305          | 0.394  | 0.483         | 0.587  |
|                               | <b>4HOPY-c</b>     | 0.754              | 0.782  | 0.944          | 0.955  | 0.832         | 0.855  |
| 2- HO-pyrimidine <sup>e</sup> | <b>2HOPM-a1/a2</b> | 1.000              | 0.961  | 0.990          | 0.989  | 0.856         | 0.776  |
|                               | <b>2HOPM-b/d</b>   | 0.785              | 0.744  | 0.788          | 0.789  | 0.730         | 0.774  |
|                               | <b>2HOPM-c</b>     | 0.259              | 0.350  | 0.087          | 0.154  | 0.454         | 0.558  |
| 4- HO-pyrimidine <sup>e</sup> | <b>4HOPM-a1</b>    | 0.995              | 0.957  | 0.983          | 0.977  | 0.870         | 0.790  |
|                               | <b>4HOPM-a2</b>    | 0.996              | 0.950  | 0.983          | 0.977  | 0.892         | 0.801  |
|                               | <b>4HOPM-b</b>     | 0.774              | 0.782  | 0.824          | 0.823  | 0.731         | 0.778  |
|                               | <b>4HOPM-c</b>     | 0.681              | 0.706  | 0.937          | 0.949  | 0.795         | 0.816  |
|                               | <b>4HOPM-d</b>     | 0.313              | 0.401  | 0.060          | 0.153  | 0.491         | 0.584  |

<sup>a</sup> HOMED6 for six-membered ring (six bonds). <sup>b</sup> Calculated for structures optimized at the DFT(B3LYP)/6-311+G(d,p) level. <sup>c</sup> HOMED7 for entire molecule (eight bonds). <sup>d</sup> Data taken from ref. [18]. <sup>e</sup> Data taken from ref. [49].

**Table S5.** HOMED6<sup>a,b</sup> and HOMED7<sup>b,c</sup> indices for neutral, positively and negatively ionized tautomers-rotamers of aniline and mono-amino aromatic azines.

| Compound                                    | Isomer            | Neutral |        | Radical cation |        | Radical anion |        |
|---------------------------------------------|-------------------|---------|--------|----------------|--------|---------------|--------|
|                                             |                   | HOMED6  | HOMED7 | HOMED6         | HOMED7 | HOMED6        | HOMED7 |
| Aniline <sup>d</sup>                        | <b>a</b>          | 0.998   | 0.948  | 0.926          | 0.942  | 0.994         | 0.952  |
|                                             | <b>b1/d2</b>      | 0.384   | 0.486  | 0.711          | 0.760  | 0.490         | 0.597  |
|                                             | <b>b2/d1</b>      | 0.353   | 0.459  | 0.670          | 0.725  | 0.470         | 0.582  |
|                                             | <b>c</b>          | 0.413   | 0.511  | 0.680          | 0.747  | 0.514         | 0.595  |
| 2-H <sub>2</sub> N-pyridine <sup>e</sup>    | <b>2APY-a</b>     | 0.994   | 0.996  | 0.929          | 0.944  | 0.923         | 0.846  |
|                                             | <b>2APY-b1</b>    | 0.767   | 0.791  | 0.913          | 0.925  | 0.714         | 0.772  |
|                                             | <b>2APY-b2</b>    | 0.802   | 0.818  | 0.927          | 0.937  | 0.786         | 0.829  |
|                                             | <b>2APY-c1</b>    | 0.356   | 0.453  | 0.669          | 0.721  | 0.535         | 0.605  |
|                                             | <b>2APY-c2</b>    | 0.352   | 0.454  | 0.722          | 0.779  | 0.486         | 0.595  |
|                                             | <b>2APY-d1</b>    | 0.365   | 0.453  | 0.697          | 0.755  | 0.500         | 0.599  |
|                                             | <b>2APY-d2</b>    | 0.324   | 0.424  | 0.200          | 0.266  | 0.448         | 0.560  |
| 4-H <sub>2</sub> N-pyridine <sup>e</sup>    | <b>4APY-a</b>     | 0.996   | 0.969  | 0.947          | 0.958  | 0.983         | 0.956  |
|                                             | <b>4APY-b1/d2</b> | 0.334   | 0.440  | 0.587          | 0.659  | 0.498         | 0.602  |
|                                             | <b>4APY-b2/d1</b> | 0.373   | 0.470  | 0.683          | 0.742  | 0.520         | 0.618  |
|                                             | <b>4APY-c</b>     | 0.744   | 0.779  | 0.936          | 0.949  | 0.820         | 0.849  |
| 2-H <sub>2</sub> N-pyrimidine <sup>f</sup>  | <b>2APM-a</b>     | 0.995   | 0.986  | 0.939          | 0.951  | 0.870         | 0.812  |
|                                             | <b>2APM-b1/d2</b> | 0.743   | 0.760  | 0.925          | 0.917  | 0.701         | 0.758  |
|                                             | <b>2APM-b2/d1</b> | 0.790   | 0.795  | 0.945          | 0.955  | 0.779         | 0.819  |
|                                             | <b>2APM-c</b>     | 0.298   | 0.397  | 0.173          | 0.248  | 0.489         | 0.596  |
| 4-H <sub>2</sub> N-pyrimidines <sup>g</sup> | <b>4APM-a</b>     | 0.991   | 0.981  | 0.950          | 0.960  | 0.904         | 0.843  |
|                                             | <b>4APM-b1</b>    | 0.737   | 0.756  | 0.924          | 0.936  | 0.712         | 0.767  |
|                                             | <b>4APM-b2</b>    | 0.707   | 0.736  | 0.938          | 0.949  | 0.775         | 0.818  |
|                                             | <b>4APM-c1</b>    | 0.664   | 0.701  | 0.917          | 0.934  | 0.777         | 0.805  |
|                                             | <b>4APM-c2</b>    | 0.663   | 0.702  | 0.921          | 0.936  | 0.773         | 0.804  |
|                                             | <b>4APM-d1</b>    | 0.346   | 0.435  | 0.122          | 0.226  | 0.557         | 0.640  |
|                                             | <b>4APM-d2</b>    | 0.170   | 0.297  | 0.106          | 0.210  | 0.470         | 0.574  |

<sup>a</sup> HOMED6 for six-membered ring (six bonds). <sup>b</sup> Calculated for structures optimized at the DFT(B3LYP)/6-311+G(d,p) level. <sup>c</sup> HOMED7 for entire molecule (eight bonds). <sup>d</sup> Data from ref. [22].

<sup>e</sup> Data from ref. [58]. <sup>f</sup> Data from ref. [59]. <sup>g</sup> Data from refs [60,61].

**Table S6.** HOMED6<sup>a,b</sup> and HOMED8<sup>b,c</sup> indices for neutral, positively and negatively ionized tautomers-rotamers of pyrimidine bases.

| Compound              | Isomer | Neutral |        | Radical cation |        | Radical anion |        |
|-----------------------|--------|---------|--------|----------------|--------|---------------|--------|
|                       |        | HOMED6  | HOMED8 | HOMED6         | HOMED8 | HOMED6        | HOMED8 |
| Uracil <sup>d</sup>   | U13    | 0.698   | 0.688  | 0.571          | 0.553  | 0.567         | 0.659  |
|                       | U17a   | 0.650   | 0.649  | 0.913          | 0.924  | 0.773         | 0.777  |
|                       | U17b   | 0.741   | 0.728  | 0.933          | 0.942  | 0.770         | 0.762  |
|                       | U18a   | 0.788   | 0.762  | 0.789          | 0.796  | 0.763         | 0.701  |
|                       | U18b   | 0.770   | 0.738  | 0.836          | 0.839  | 0.768         | 0.684  |
|                       | U35    | 0.342   | 0.402  | 0.464          | 0.521  | 0.336         | 0.469  |
|                       | U37a   | 0.769   | 0.755  | 0.807          | 0.806  | 0.600         | 0.592  |
|                       | U37b   | 0.754   | 0.739  | 0.785          | 0.787  | nf            | nf     |
|                       | U38a   | 0.771   | 0.747  | 0.709          | 0.720  | 0.748         | 0.680  |
|                       | U38b   | 0.788   | 0.758  | 0.765          | 0.768  | 0.749         | 0.681  |
|                       | U57a   | 0.337   | 0.429  | 0.194          | 0.323  | 0.500         | 0.515  |
|                       | U57b   | 0.384   | 0.466  | 0.200          | 0.331  | 0.496         | 0.515  |
|                       | U58a   | 0.281   | 0.370  | -0.017         | 0.116  | 0.416         | 0.460  |
|                       | U58b   | 0.217   | 0.320  | 0.032          | 0.155  | 0.380         | 0.413  |
|                       | U78aa  | 0.995   | 0.926  | 0.893          | 0.914  | 0.859         | 0.690  |
|                       | U78ab  | 0.994   | 0.918  | 0.875          | 0.898  | 0.880         | 0.691  |
|                       | U78ba  | 0.996   | 0.925  | 0.903          | 0.924  | 0.843         | 0.674  |
|                       | U78bb  | 0.996   | 0.920  | 0.984          | 0.976  | 0.864         | 0.678  |
| Cytosine <sup>e</sup> | C13a   | 0.688   | 0.690  | 0.727          | 0.714  | 0.582         | 0.670  |
|                       | C13b   | 0.709   | 0.706  | 0.745          | 0.730  | 0.634         | 0.708  |
|                       | C17aa  | 0.629   | 0.636  | 0.916          | 0.925  | 0.760         | 0.772  |
|                       | C17ab  | 0.622   | 0.633  | 0.915          | 0.920  | 0.753         | 0.766  |
|                       | C17ba  | 0.671   | 0.680  | 0.924          | 0.933  | 0.762         | 0.762  |
|                       | C17bb  | 0.671   | 0.683  | 0.930          | 0.935  | 0.762         | 0.757  |
|                       | C18    | 0.785   | 0.791  | 0.850          | 0.866  | 0.756         | 0.703  |
|                       | C35a   | 0.351   | 0.415  | nf             | nf     | 0.363         | 0.494  |
|                       | C35b   | 0.331   | 0.402  | 0.150          | 0.276  | 0.381         | 0.507  |
|                       | C37aa  | 0.734   | 0.731  | 0.902          | 0.912  | 0.625         | 0.611  |
|                       | C37ab  | 0.777   | 0.767  | 0.923          | 0.931  | 0.704         | 0.674  |
|                       | C37ba  | 0.714   | 0.752  | 0.878          | 0.890  | 0.798         | 0.797  |



|                          |               |       |       |        |       |       |       |
|--------------------------|---------------|-------|-------|--------|-------|-------|-------|
|                          | <b>C37bb</b>  | 0.768 | 0.755 | 0.902  | 0.912 | nf    | nf    |
|                          | <b>C38</b>    | 0.799 | 0.794 | 0.749  | 0.754 | 0.727 | 0.692 |
|                          | <b>C57aa</b>  | 0.351 | 0.439 | 0.647  | 0.734 | 0.548 | 0.550 |
|                          | <b>C57ab</b>  | 0.296 | 0.400 | nf     | nf    | 0.509 | 0.523 |
|                          | <b>C57ba</b>  | 0.395 | 0.473 | 0.650  | 0.737 | 0.549 | 0.553 |
|                          | <b>C57bb</b>  | 0.344 | 0.438 | nf     | nf    | 0.512 | 0.529 |
|                          | <b>C58</b>    | 0.267 | 0.391 | −0.017 | 0.129 | 0.434 | 0.501 |
|                          | <b>C78a</b>   | 0.990 | 0.943 | 0.896  | 0.917 | 0.853 | 0.660 |
|                          | <b>C78b</b>   | 0.992 | 0.944 | 0.912  | 0.929 | 0.849 | 0.662 |
| Isocytosine <sup>f</sup> | <b>iC13a</b>  | 0.700 | 0.695 | 0.717  | 0.714 | 0.571 | 0.662 |
|                          | <b>iC13b</b>  | 0.705 | 0.701 | 0.715  | 0.706 | 0.568 | 0.660 |
|                          | <b>iC17</b>   | 0.694 | 0.710 | 0.896  | 0.920 | 0.792 | 0.810 |
|                          | <b>iC18aa</b> | 0.757 | 0.744 | 0.928  | 0.939 | 0.726 | 0.680 |
|                          | <b>iC18ab</b> | 0.723 | 0.706 | 0.925  | 0.934 | 0.726 | 0.658 |
|                          | <b>iC18ba</b> | 0.795 | 0.771 | 0.947  | 0.952 | 0.785 | 0.721 |
|                          | <b>iC18bb</b> | 0.777 | 0.747 | 0.945  | 0.948 | 0.788 | 0.703 |
|                          | <b>iC35a</b>  | 0.371 | 0.437 | 0.428  | 0.491 | 0.422 | 0.542 |
|                          | <b>iC35b</b>  | 0.355 | 0.426 | nf     | nf    | 0.365 | 0.501 |
|                          | <b>iC37</b>   | 0.810 | 0.795 | 0.794  | 0.794 | 0.682 | 0.675 |
|                          | <b>iC38aa</b> | 0.796 | 0.773 | 0.902  | 0.913 | 0.787 | 0.717 |
|                          | <b>iC38ab</b> | 0.803 | 0.777 | 0.931  | 0.937 | nf    | nf    |
|                          | <b>iC38ba</b> | 0.733 | 0.722 | 0.864  | 0.883 | 0.728 | 0.672 |
|                          | <b>iC38bb</b> | 0.753 | 0.737 | 0.906  | 0.917 | nf    | nf    |
|                          | <b>iC57</b>   | 0.361 | 0.476 | 0.179  | 0.326 | 0.504 | 0.548 |
|                          | <b>iC58aa</b> | 0.327 | 0.414 | 0.634  | 0.722 | 0.469 | 0.511 |
|                          | <b>iC58ab</b> | 0.272 | 0.362 | 0.561  | 0.666 | 0.432 | 0.463 |
|                          | <b>iC58ba</b> | 0.331 | 0.418 | 0.636  | 0.724 | 0.459 | 0.502 |
|                          | <b>iC58bb</b> | 0.280 | 0.369 | 0.580  | 0.680 | 0.423 | 0.456 |
|                          | <b>iC78a</b>  | 0.994 | 0.946 | 0.919  | 0.930 | 0.867 | 0.715 |
|                          | <b>iC78b</b>  | 0.991 | 0.936 | 0.916  | 0.924 | 0.903 | 0.740 |

<sup>a</sup> HOMED6 for six-membered ring (six bonds). <sup>b</sup> Calculated for structures optimized at the DFT(B3LYP)/6-311+G(d,p) level (nf – structure not found). <sup>c</sup> HOMED8 for entire molecule (eight bonds). <sup>d</sup> Data from refs [62,63]. <sup>e</sup> Data from ref. [64]. <sup>f</sup> Data from refs [28,57,65].

**Table S7.** Composition of isomeric mixtures for neutral mono-hydroxy aromatic azines estimated at the G2 level.

| Derivative   | Amount of isomer ( $x_i$ in %) |                    |                     |                     |                     | Ref. |
|--------------|--------------------------------|--------------------|---------------------|---------------------|---------------------|------|
|              | <b>a1</b>                      | <b>a2</b>          | <b>b</b>            | <b>c</b>            | <b>d</b>            |      |
| <b>2HOPY</b> | 73 <sup>b</sup>                | 2 10 <sup>-2</sup> | 27                  | 1 10 <sup>-14</sup> | 2 10 <sup>-15</sup> | [49] |
| <b>4HOPY</b> |                                | 99                 | 1 10 <sup>-11</sup> | 1                   | 1 10 <sup>-11</sup> | [49] |
| <b>2HOPM</b> |                                | 99                 | 1                   | 5 10 <sup>-15</sup> | 1                   | [49] |
| <b>4HOPM</b> | 20                             | 1 10 <sup>-2</sup> | 80                  | 5 10 <sup>-5</sup>  | 9 10 <sup>-16</sup> | [49] |

**Figure S1.** Twenty-one tautomers-rotamers possible for **iC**. Two labile protons indicated in bold red color.

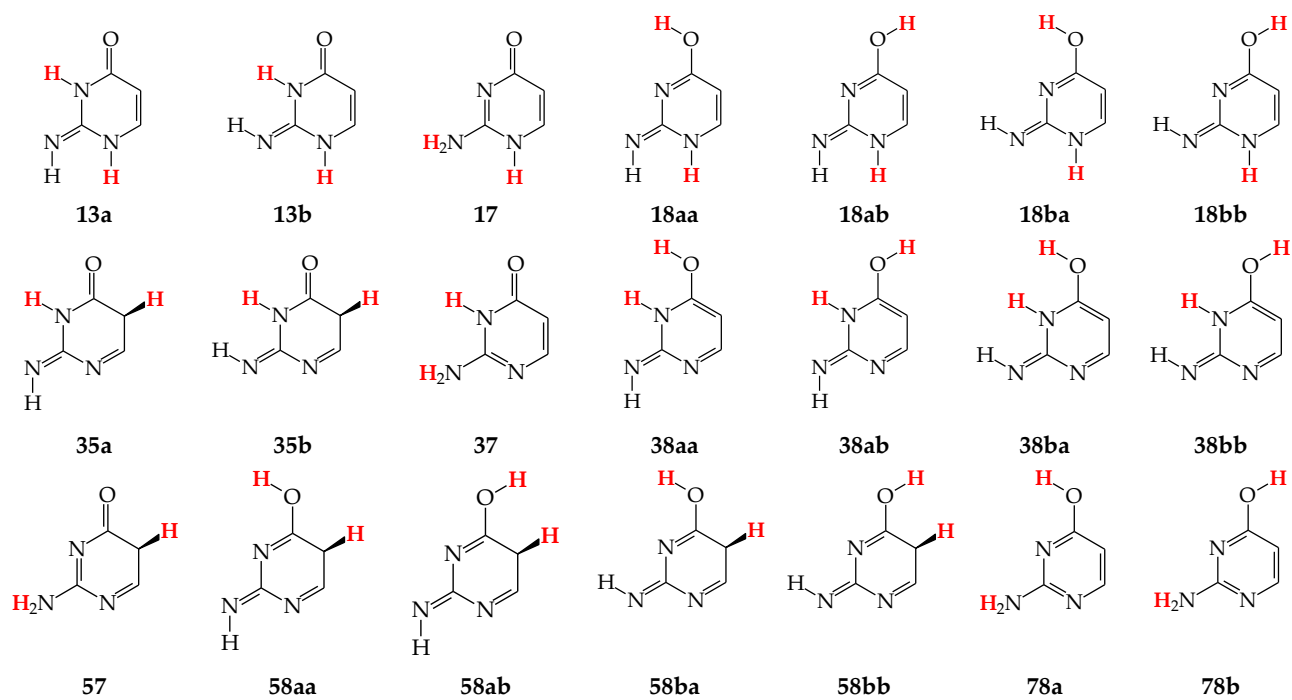

**Figure S2.** Plots between  $\Delta G$ s of all tautomers-rotamers of neutral pyrimidine bases. DFT data taken from refs [62,64,65].

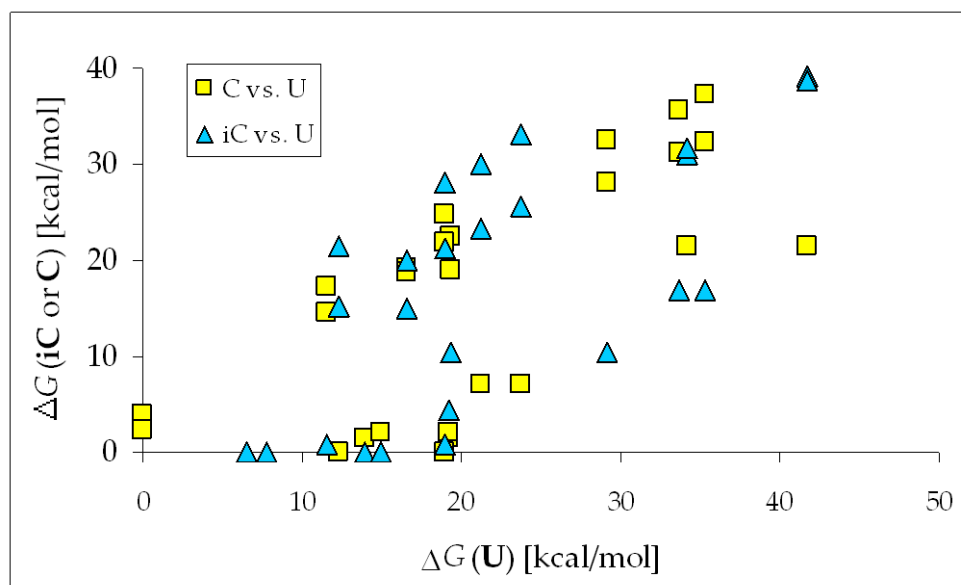

**Figure S3.** Plots between HOMED6s and  $\Delta G$ s of all tautomers-rotamers of mono-hydroxy aromatic azines (including phenol) and uracil containing one and two exo OH, respectively (a), and also for all isomers of cytosine and isocytosine containing one exo OH and one exo NH<sub>2</sub> (b). DFT data taken from refs [18,44,62,64,65].

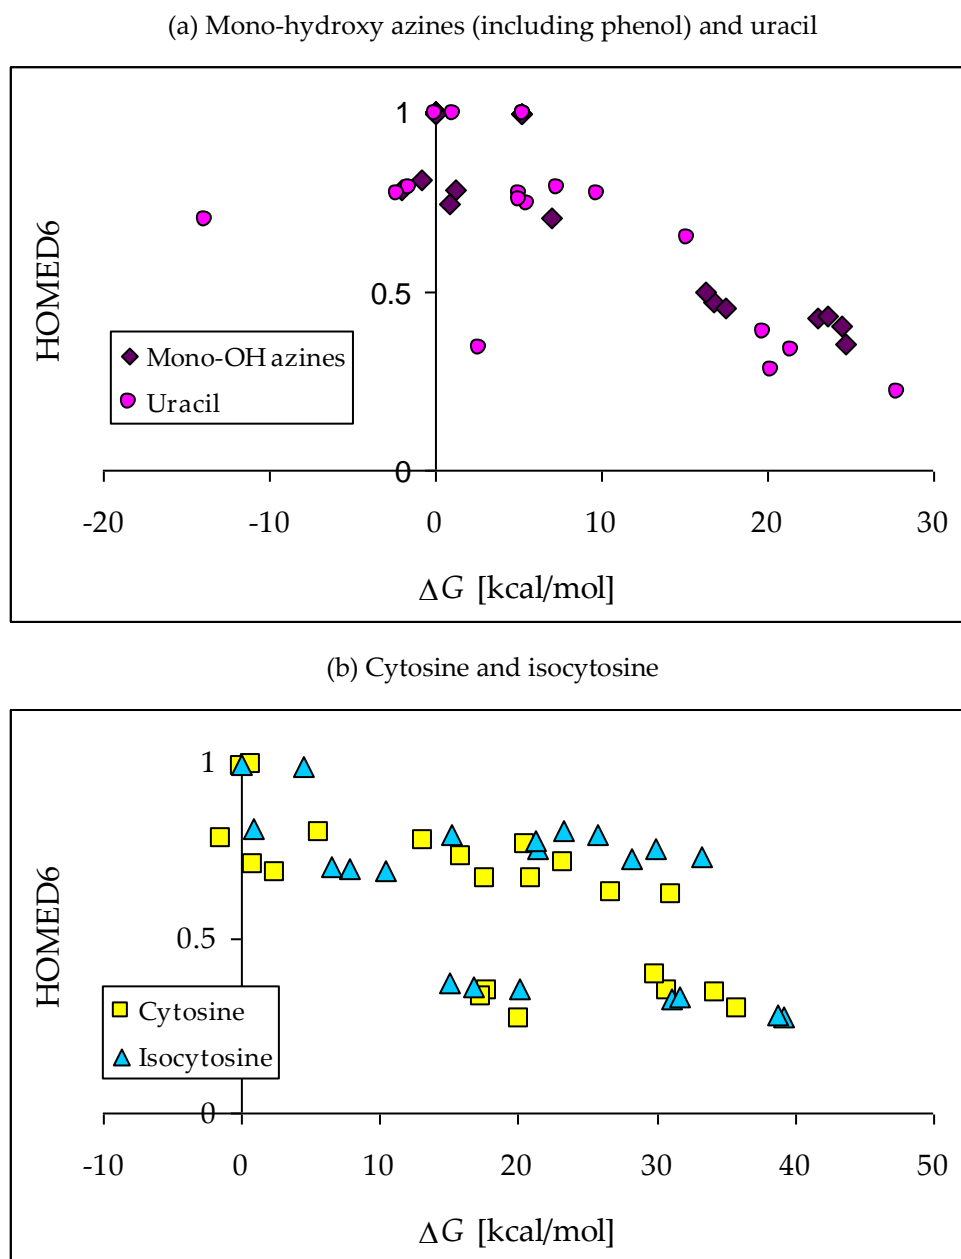

**Figure S4.** Plots between HOMED8s and  $\Delta G$ s of all tautomers-rotamers of neutral pyrimidine bases. DFT data taken from refs [62,64,65].

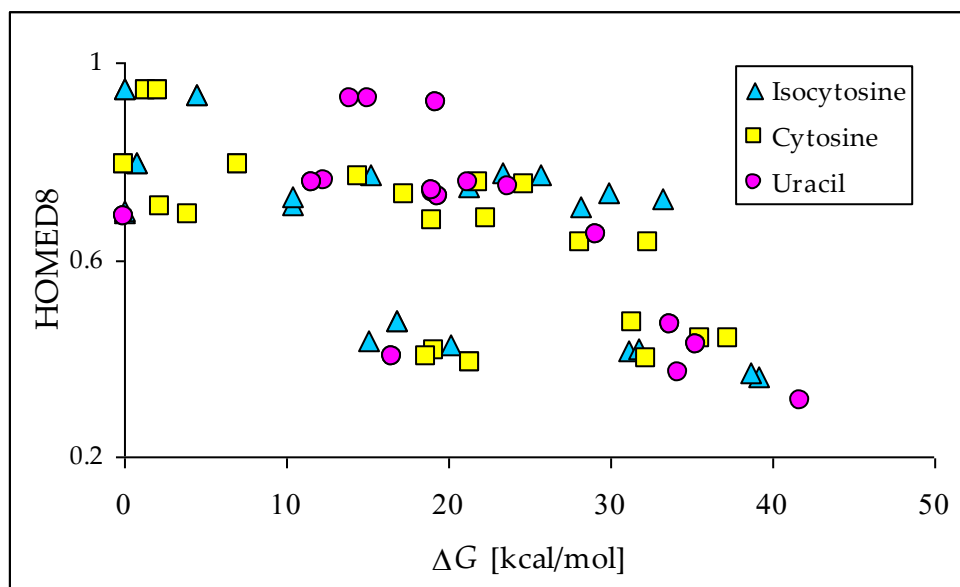

**Figure S5.** Lack of linear relations between the reformulated HOMA and HOMED indices estimated for all tautomers-rotamers of neutral pyrimidine bases in the six-membered ring (a) and in the entire molecule (b). DFT-calculated geometric parameters taken from refs [65,68].

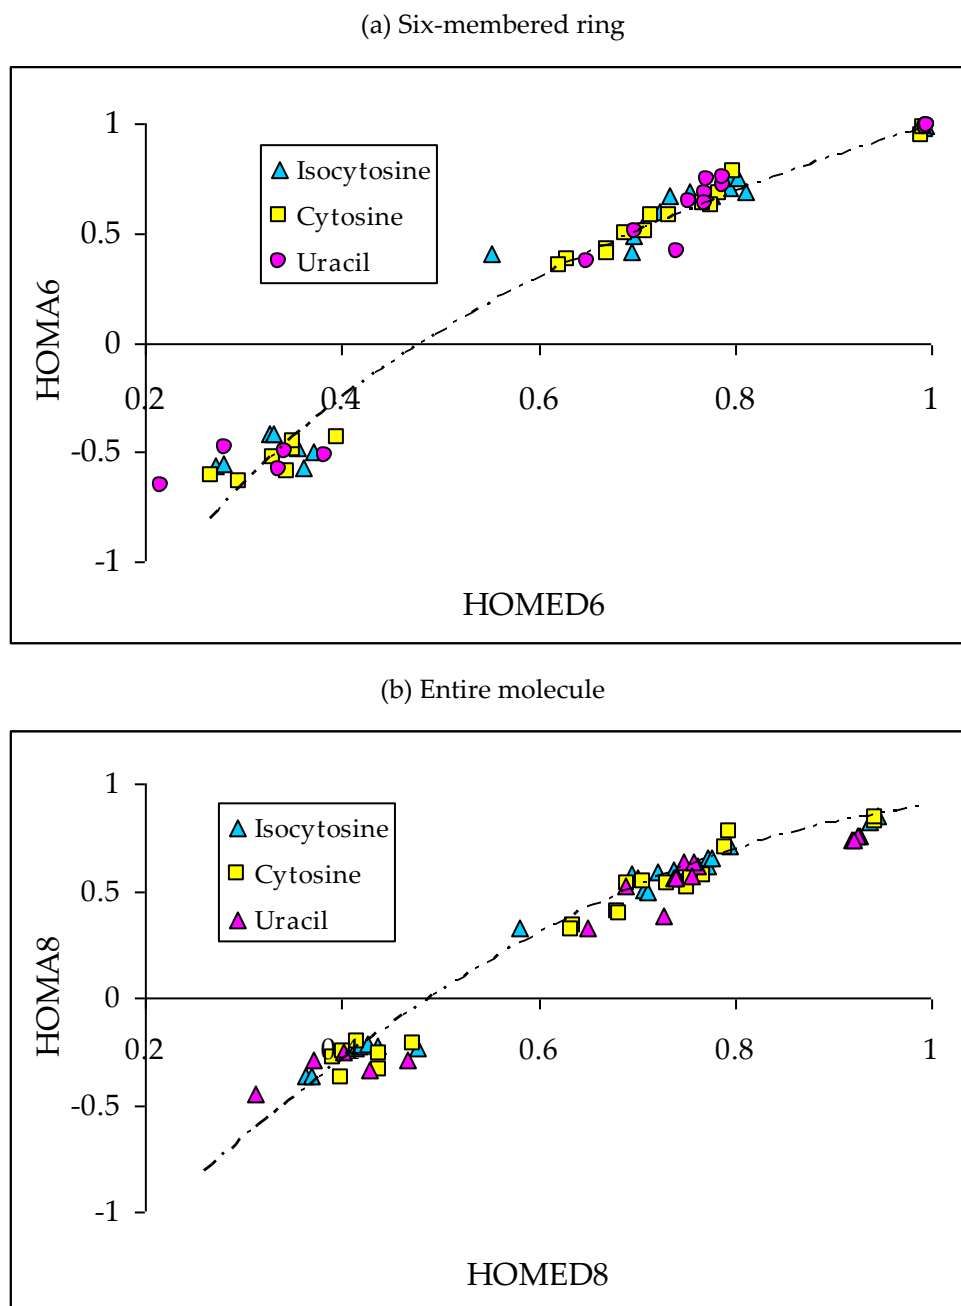

**Figure S6.** Plots between  $\Delta G$ s of neutral and ionized tautomers-rotamers of uracil (a), cytosine (b), and isocytosine (c). DFT data taken from refs [28,57,62,63,64,65].

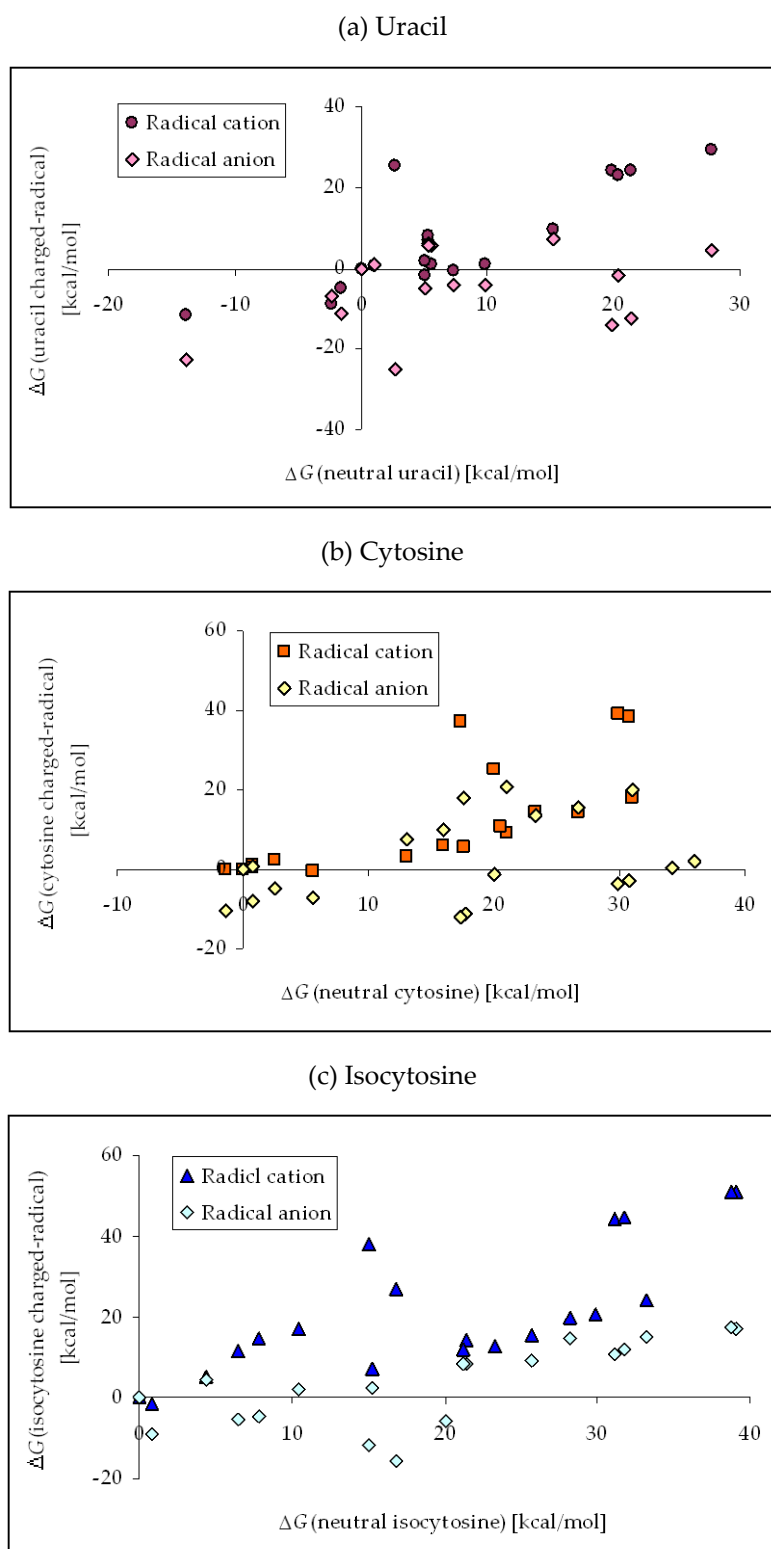



**Figure S7.** Plots between HOMED8s of neutral and ionized tautomers-rotamers of uracil (a), cytosine (b), and isocytosine (c). DFT data taken from refs [28,57,62,63,64,65].

(a) Uracil

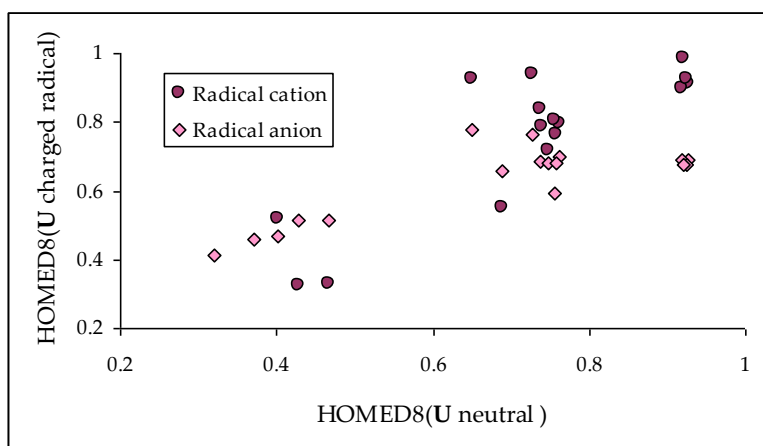

(b) Cytosine

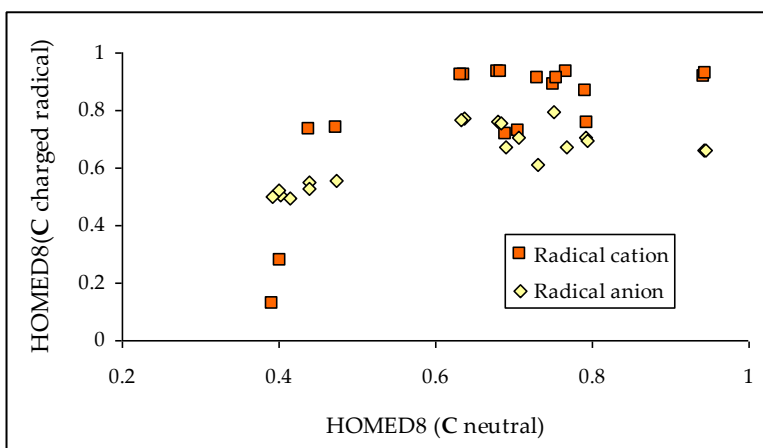

(c) Isocytosine

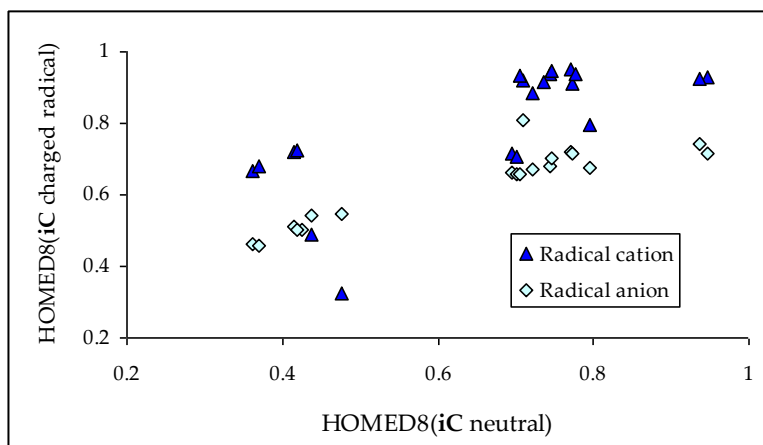

### List of abbreviations applied in the main text

|              |                                                                                                                     |
|--------------|---------------------------------------------------------------------------------------------------------------------|
| <b>2APM</b>  | 2-aminopyrimidine                                                                                                   |
| <b>4APM</b>  | 4-aminopyrimidine                                                                                                   |
| <b>5APM</b>  | 5-aminopyrimidine                                                                                                   |
| <b>2APY</b>  | 2-aminopyridine                                                                                                     |
| <b>3APY</b>  | 3-aminopyridine                                                                                                     |
| <b>4APY</b>  | 4-aminopyridine                                                                                                     |
| <b>2HOPM</b> | 2-hydroxypyrimidine                                                                                                 |
| <b>4HOPM</b> | 4-hydroxypyrimidine                                                                                                 |
| <b>5HOPM</b> | 5-hydroxypyrimidine                                                                                                 |
| <b>2HOPY</b> | 2-hydroxypyridine                                                                                                   |
| <b>3HOPY</b> | 3-hydroxypyridine                                                                                                   |
| <b>4HOPY</b> | 4-hydroxypyridine                                                                                                   |
| <b>A</b>     | adenine                                                                                                             |
| $\alpha$     | normalization constant                                                                                              |
| AM1          | Austin Model 1                                                                                                      |
| B3LYP        | Becke-style three-parameter hybrid exchange functional with non-local correlation functional of Lee, Yang, and Parr |
| <b>C</b>     | cytosine                                                                                                            |
| CASSCF       | complete active space self-consistent field                                                                         |
| CCSD(T)      | coupled cluster method including single-, double- and triple-excitation                                             |
| CID          | collision-induced dissociation                                                                                      |
| DFT          | density functional theory                                                                                           |
| $E$          | energy                                                                                                              |
| EA           | electron affinity                                                                                                   |
| ESR          | electron spin resonance                                                                                             |
| FT-MW        | Fourier transform microwave                                                                                         |
| <b>G</b>     | guanine                                                                                                             |
| $G$          | Gibbs energy                                                                                                        |
| G2           | Gaussian-2 theory                                                                                                   |
| G2(MP2)      | MP2 variant of Gaussian-2 theory                                                                                    |
| G4           | Gaussian-4 theory                                                                                                   |
| $G_n$        | Gaussian- $n$ theory                                                                                                |
| <b>HX</b>    | hypoxanthine                                                                                                        |
| $H$          | enthalpy                                                                                                            |
| HF           | Hartree-Fock self-consistent field                                                                                  |
| HOMA         | harmonic oscillator model of aromaticity                                                                            |
| HOMED        | harmonic oscillator model of electron delocalization                                                                |
| <b>HX</b>    | hypoxanthine                                                                                                        |
| <b>iC</b>    | isocytosine                                                                                                         |
| ICR          | ion cyclotron resonance                                                                                             |
| IE           | ionization energy                                                                                                   |
| IR           | infrared                                                                                                            |
| IRMPD        | infrared multiple-photon dissociation                                                                               |
| IUPAC        | International Union of Pure and Applied Chemistry                                                                   |

|             |                                                                                             |
|-------------|---------------------------------------------------------------------------------------------|
| <i>K</i>    | equilibrium constant                                                                        |
| LA-MB-FT-MW | laser-ablation molecular-beam Fourier-transform microwave                                   |
| LFER        | linear free-energy relationship                                                             |
| <b>M</b>    | molecule                                                                                    |
| MNDO        | modified neglect of diatomic overlap                                                        |
| MP2         | second-order Møller-Plesset (perturbation theory)                                           |
| MP $n$      | $n$ -order Møller-Plesset (perturbation theory)                                             |
| MS          | mass spectrometry                                                                           |
| MW          | microwave                                                                                   |
| $n$         | number of bonds                                                                             |
| NMR         | nuclear magnetic resonance                                                                  |
| PM3         | parametric method 3                                                                         |
| PES         | photoelectron spectroscopy                                                                  |
| QCISD(T)    | quadratic configuration interaction method including single-, double- and triple-excitation |
| $R$         | molar gas constant                                                                          |
| REMPI       | resonantly enhanced multiphoton ionization                                                  |
| $R_d$       | double bond-length                                                                          |
| $R_i$       | bond-length in investigated compound                                                        |
| $R_o$       | optimum bond-length                                                                         |
| $R_s$       | single bond-length                                                                          |
| RNA         | ribonucleic acid                                                                            |
| $S$         | entropy                                                                                     |
| <b>T</b>    | thymine                                                                                     |
| $T$         | temperature                                                                                 |
| TD-DFT      | time-dependent density functional theory                                                    |
| <b>U</b>    | uracil                                                                                      |
| <b>UA</b>   | uric acid                                                                                   |
| UV          | ultraviolet                                                                                 |
| UVPD        | UV-vis photodissociation                                                                    |
| <b>X</b>    | xanthine                                                                                    |
| ZEKE        | zero kinetic energy                                                                         |
